# Supplementary material for: The synthesis and biological evaluation of mycobacterial p-hydroxybenzoic acid derivatives (p-HBADs)
Source: Royal Society of Chemistry journal article supplement (doi:10.1039/c3ob42277a), 2013-12-23

## Supporting information

### The Synthesis and Biological Evaluation of Mycobacterial *p*-Hydroxybenzoic Acid Derivatives (*p*-HBADs)

Jean Bourke<sup>[a]</sup>, Corinna F. Brereton<sup>[b]</sup>, Stephen V. Gordon<sup>[c]</sup>, Ed C. Lavelle<sup>\*[b]</sup> and

<sup>a</sup>Eoin M. Scanlan<sup>\*[a]</sup>

*e-mail:* [eoin.scanlan@tcd.ie](mailto:eoin.scanlan@tcd.ie)

#### Contents:

|                                                                            |     |
|----------------------------------------------------------------------------|-----|
| Figure 3.....                                                              | S3  |
| <sup>1</sup> H and <sup>13</sup> C NMR Spectra of Compound <b>2</b> .....  | S4  |
| <sup>1</sup> H and <sup>13</sup> C NMR Spectra of Compound <b>3</b> .....  | S5  |
| <sup>1</sup> H and <sup>13</sup> C NMR Spectra of Compound <b>4</b> .....  | S6  |
| <sup>1</sup> H and <sup>13</sup> C NMR Spectra of Compound <b>5</b> .....  | S7  |
| <sup>1</sup> H and <sup>13</sup> C NMR Spectra of Compound <b>6</b> .....  | S8  |
| <sup>1</sup> H and <sup>13</sup> C NMR Spectra of Compound <b>7</b> .....  | S9  |
| <sup>1</sup> H and <sup>13</sup> C NMR Spectra of Compound <b>8</b> .....  | S10 |
| <sup>1</sup> H and <sup>13</sup> C NMR Spectra of Compound <b>9</b> .....  | S11 |
| <sup>1</sup> H and <sup>13</sup> C NMR Spectra of Compound <b>10</b> ..... | S12 |
| <sup>1</sup> H and <sup>13</sup> C NMR Spectra of Compound <b>11</b> ..... | S13 |
| <sup>1</sup> H and <sup>13</sup> C NMR Spectra of Compound <b>12</b> ..... | S14 |
| <sup>1</sup> H and <sup>13</sup> C NMR Spectra of Compound <b>13</b> ..... | S15 |
| <sup>1</sup> H and <sup>13</sup> C NMR Spectra of Compound <b>14</b> ..... | S16 |
| <sup>1</sup> H and <sup>13</sup> C NMR Spectra of Compound <b>15</b> ..... | S17 |
| <sup>1</sup> H and <sup>13</sup> C NMR Spectra of Compound <b>16</b> ..... | S18 |

|                                                                            |     |
|----------------------------------------------------------------------------|-----|
| <sup>1</sup> H and <sup>13</sup> C NMR Spectra of Compound <b>17</b> ..... | S19 |
| <sup>1</sup> H and <sup>13</sup> C NMR Spectra of Compound <b>18</b> ..... | S20 |
| <sup>1</sup> H and <sup>13</sup> C NMR Spectra of Compound <b>20</b> ..... | S21 |
| <sup>1</sup> H and <sup>13</sup> C NMR Spectra of Compound <b>21</b> ..... | S22 |
| <sup>1</sup> H and <sup>13</sup> C NMR Spectra of Compound <b>22</b> ..... | S23 |
| <sup>1</sup> H and <sup>13</sup> C NMR Spectra of Compound <b>23</b> ..... | S24 |

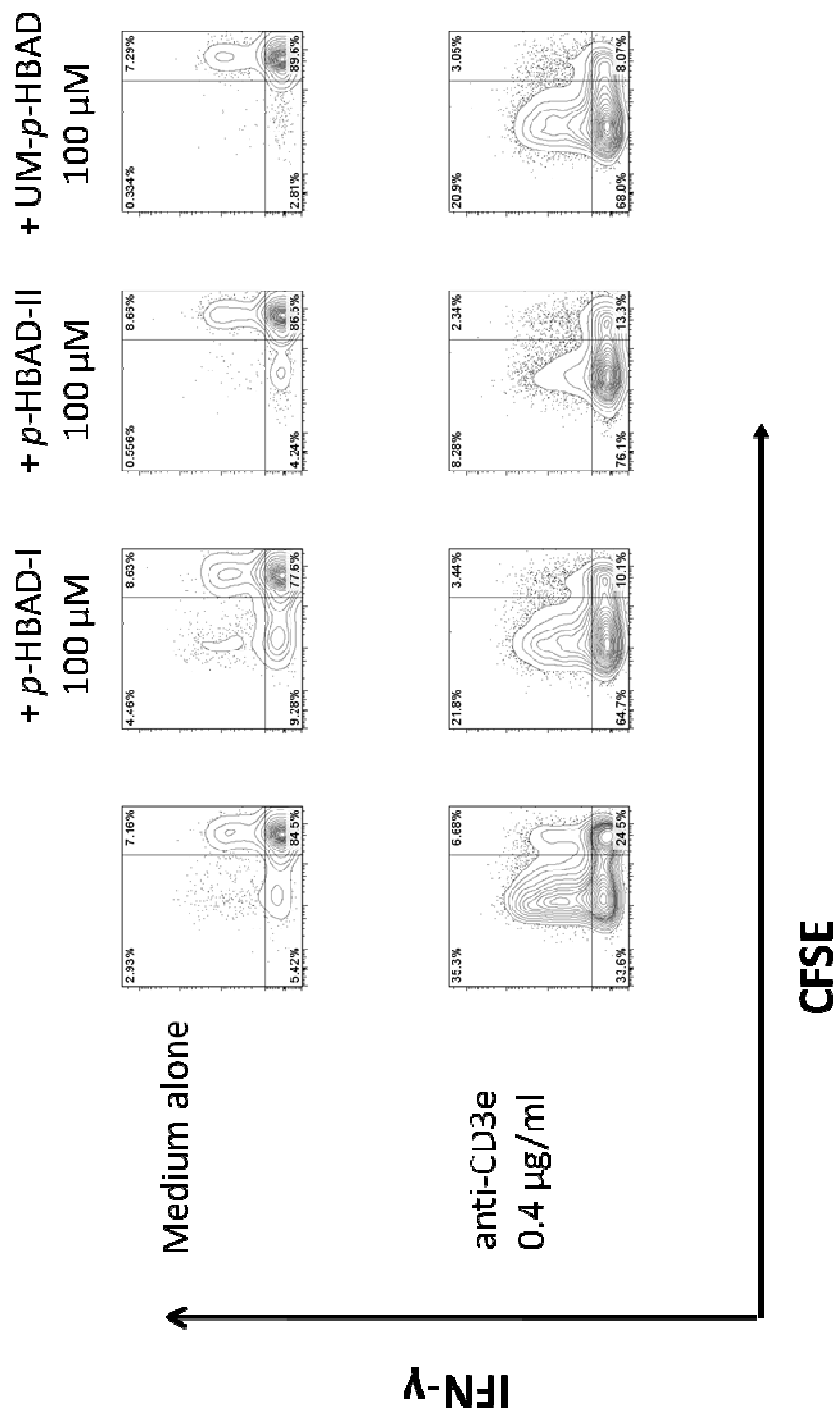

**Figure 3.** Flow cytometry data. *p*-HBADs suppress IFN- $\gamma$  production by CD4<sup>+</sup> T cells. Splenocytes were incubated with medium, *p*-HBADs alone or in the presence of anti-CD3e. Cells were incubated for 72 h and T cell proliferation and IFN- $\gamma$  production was assessed.

### <sup>1</sup>H of compound 2

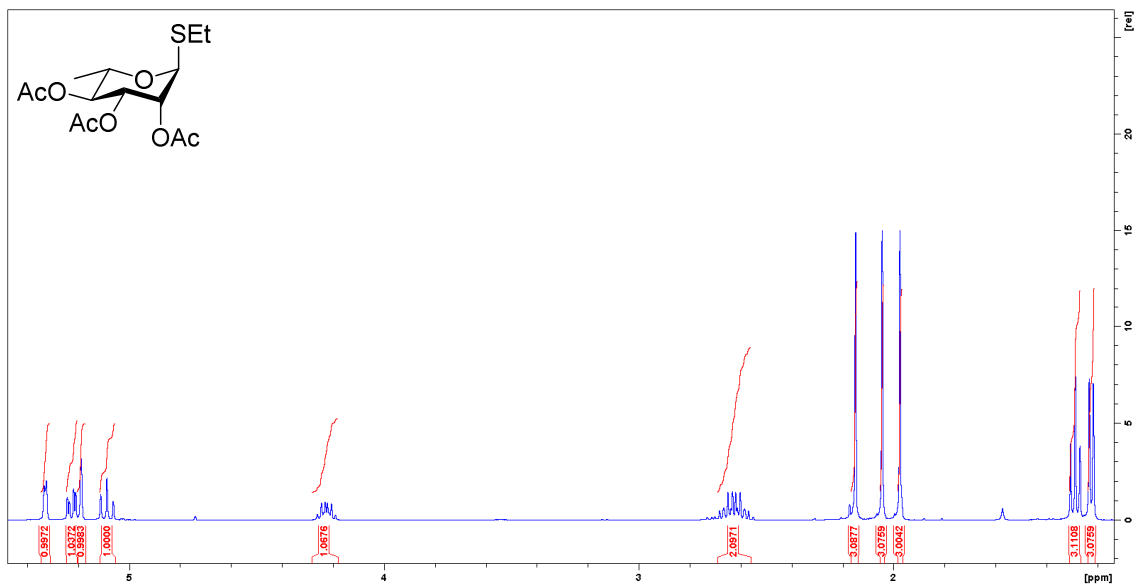

### <sup>13</sup>C of compound 2

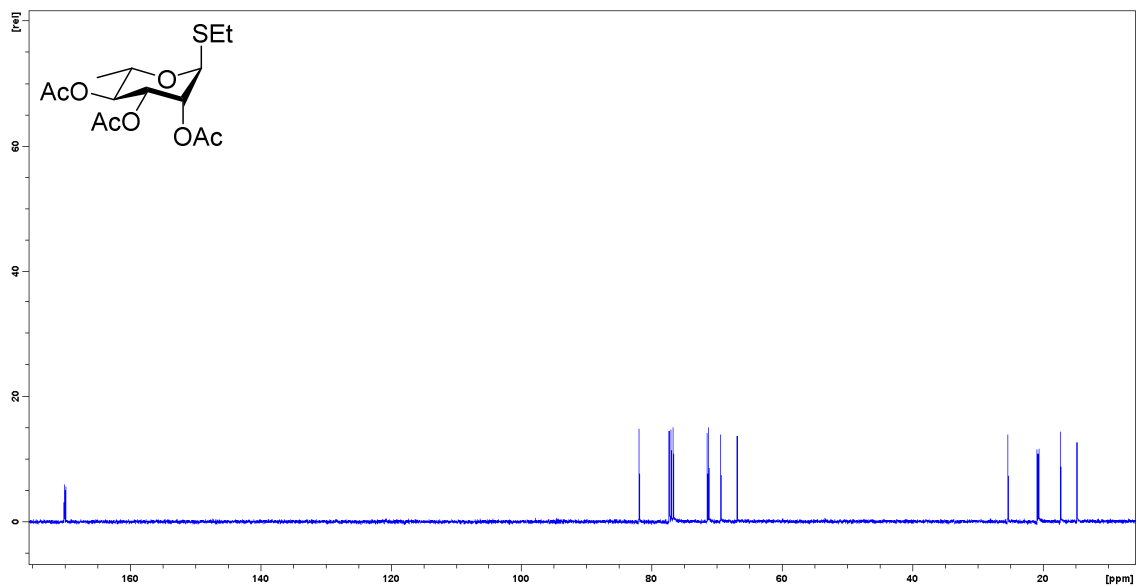

$^1\text{H}$  of compound 3

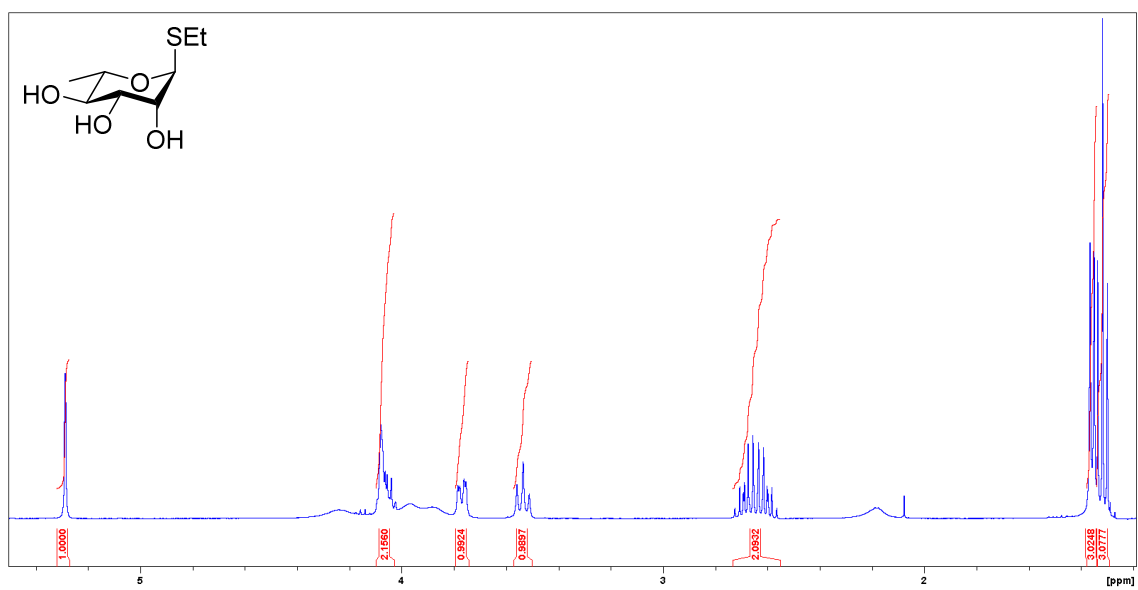

$^{13}\text{C}$  of compound 3

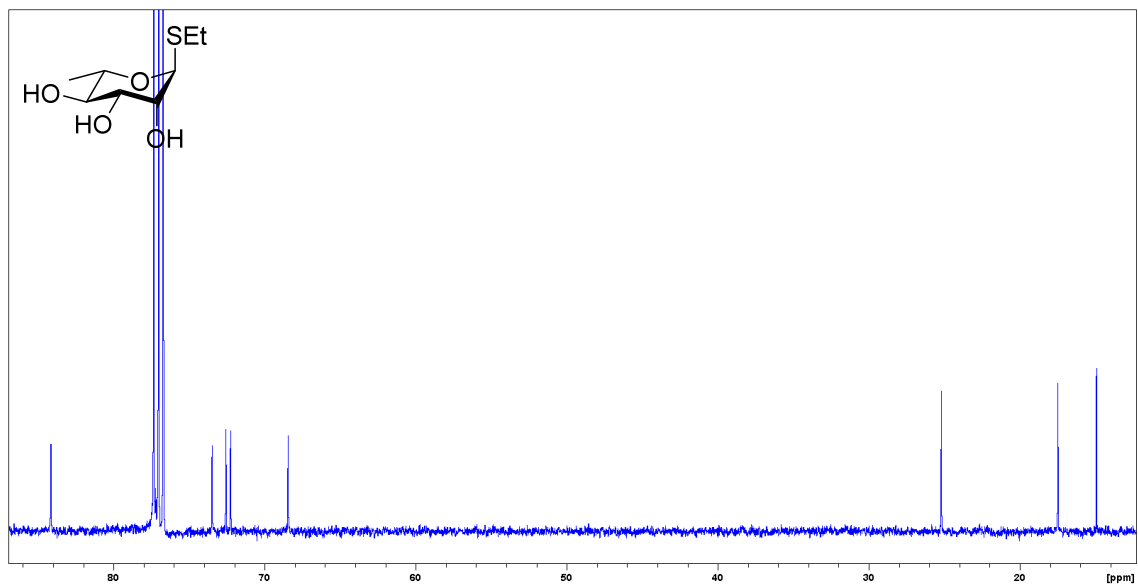

$^1\text{H}$  of compound 4

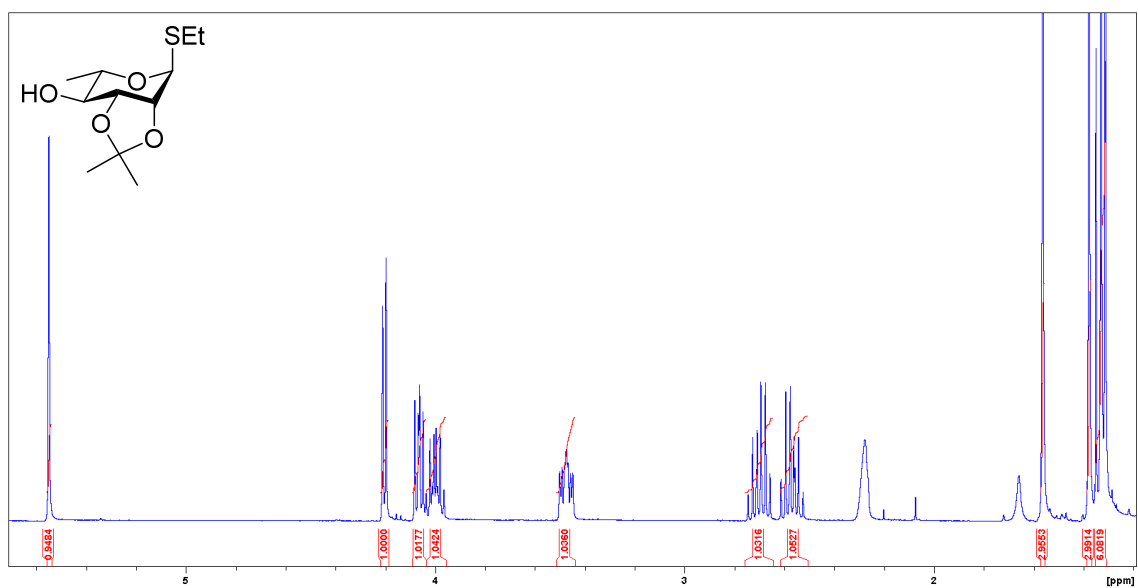

$^{13}\text{C}$  of compound 4

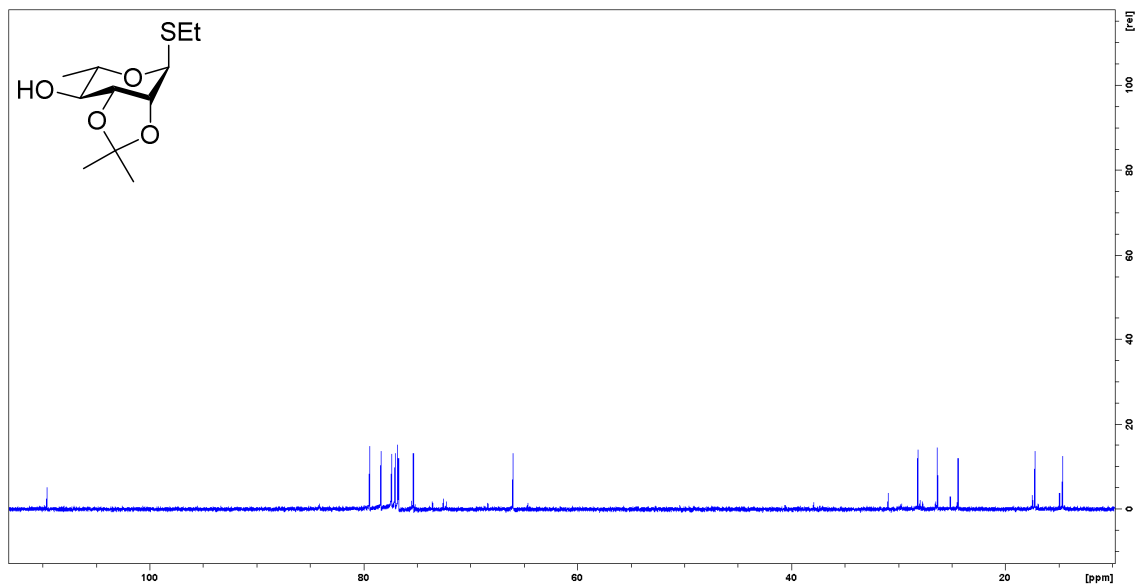

### $^1\text{H}$ of compound 5

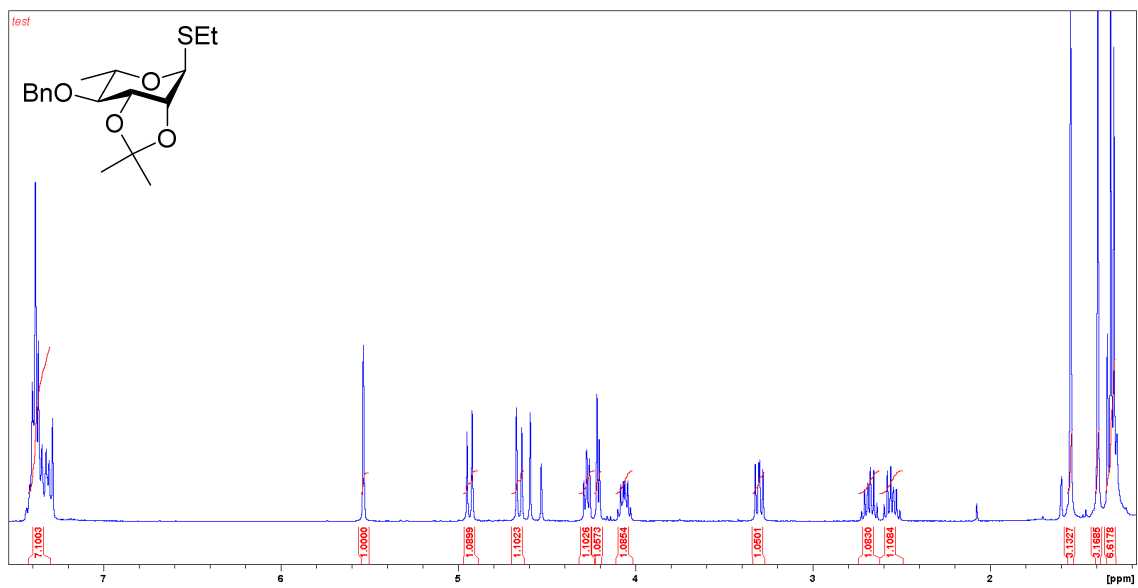

### $^{13}\text{C}$ of compound 5

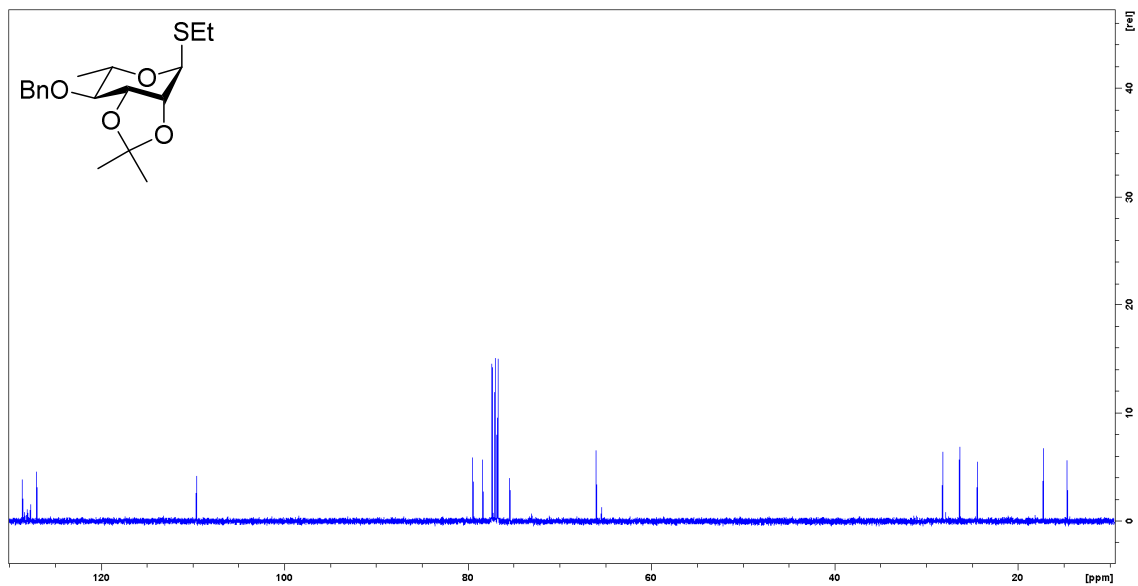

### $^1\text{H}$ of compound 6

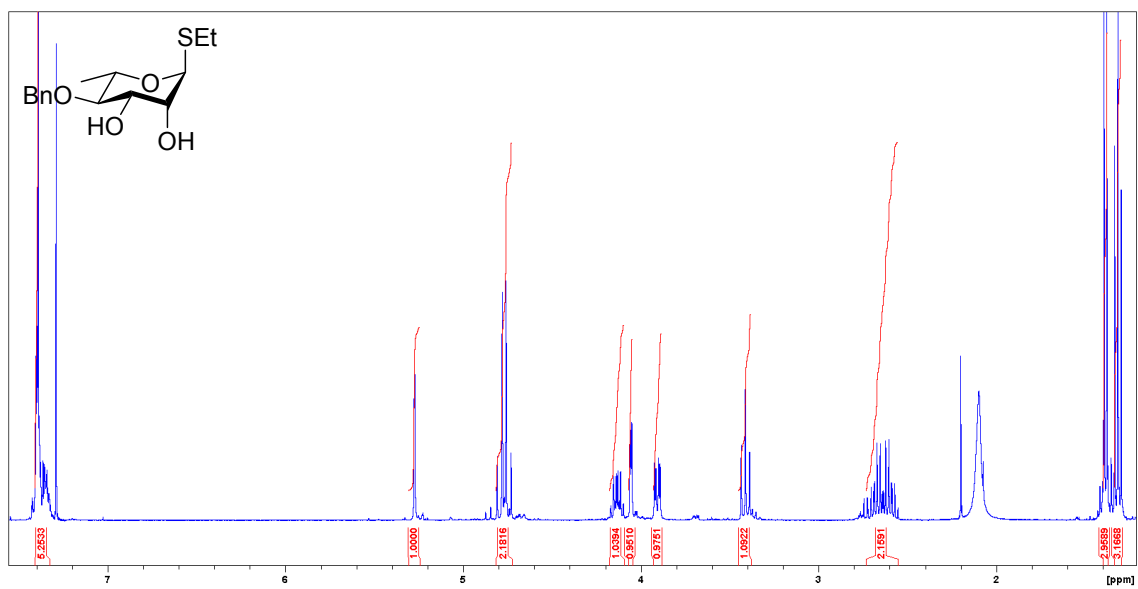

### $^{13}\text{C}$ of compound 6

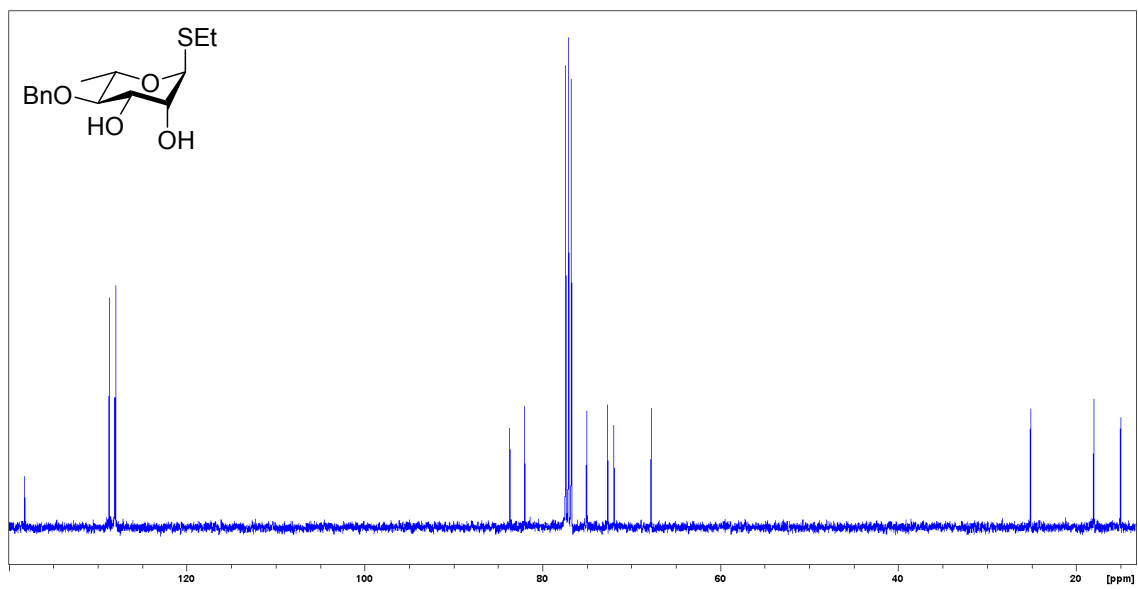



### $^1\text{H}$ of compound 7

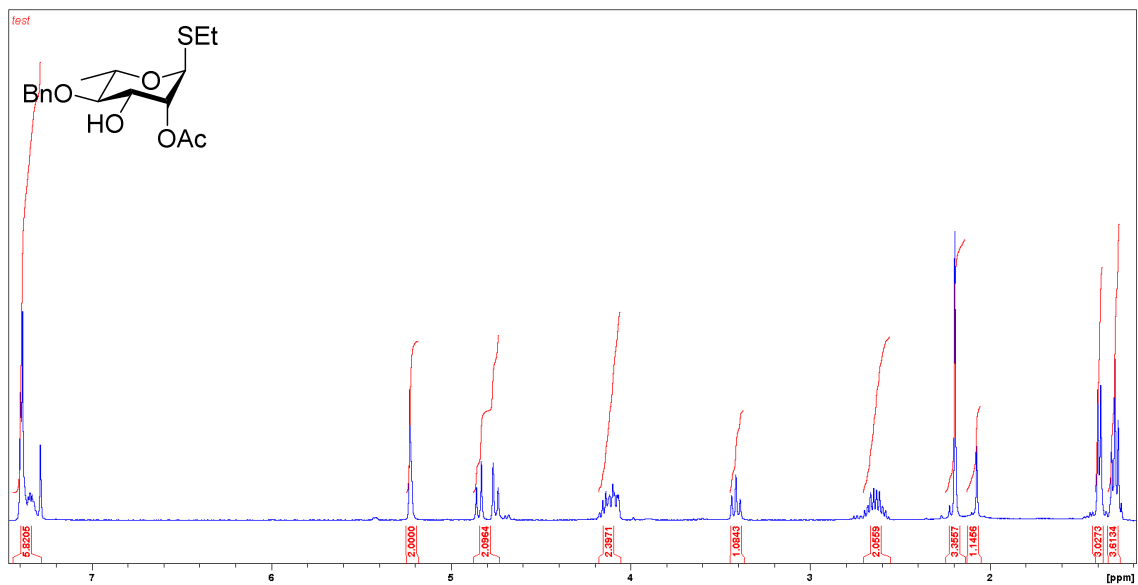

### $^{13}\text{C}$ of compound 7

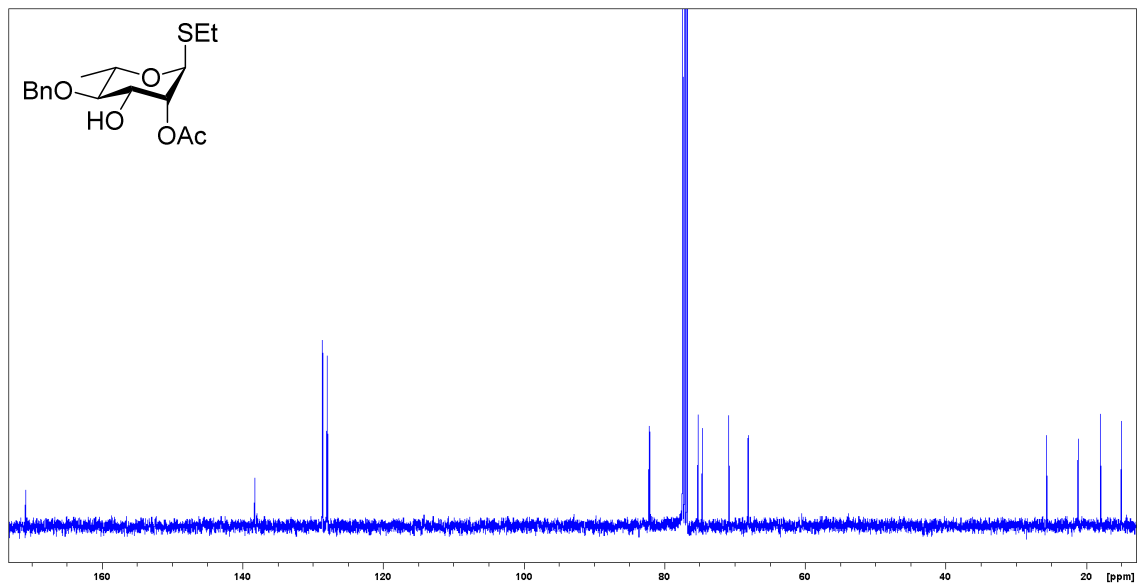

### <sup>1</sup>H of compound 8

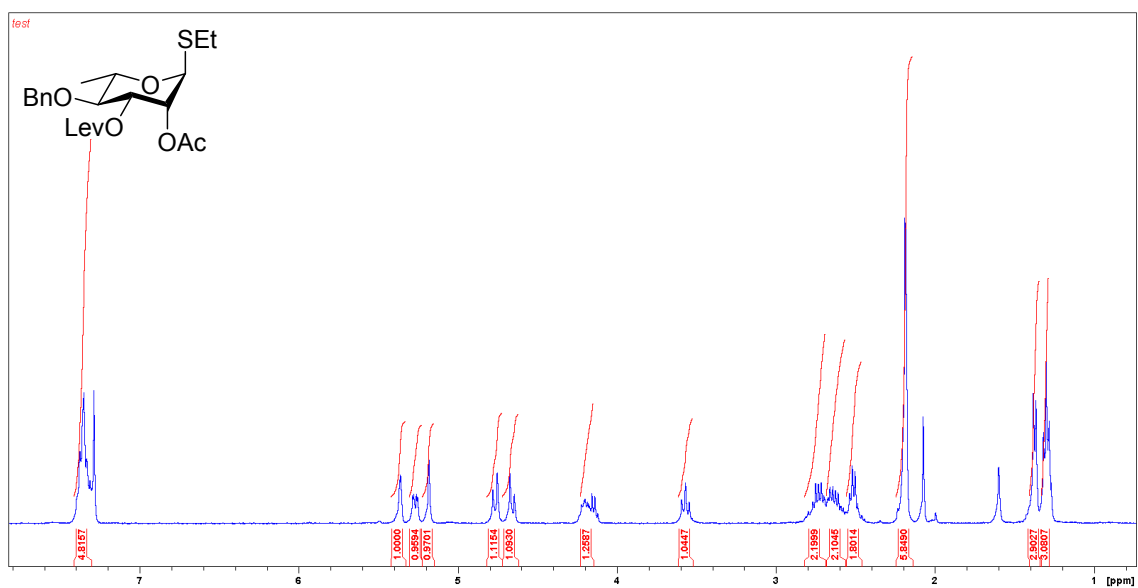

### <sup>13</sup>C of compound 8

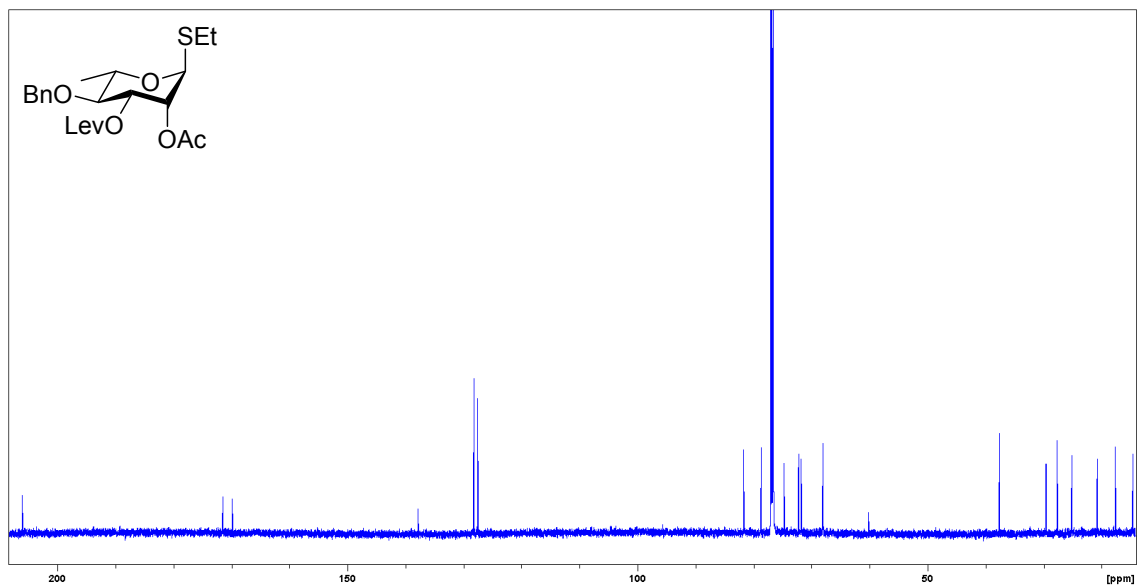

$^1\text{H}$  of compound 9

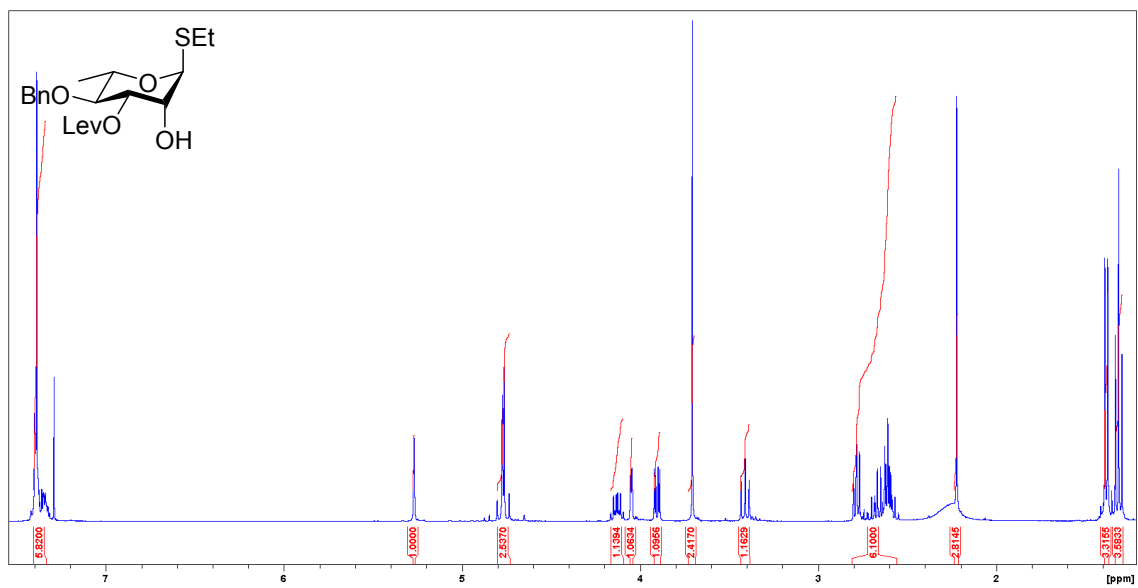

$^{13}\text{C}$  of compound 9

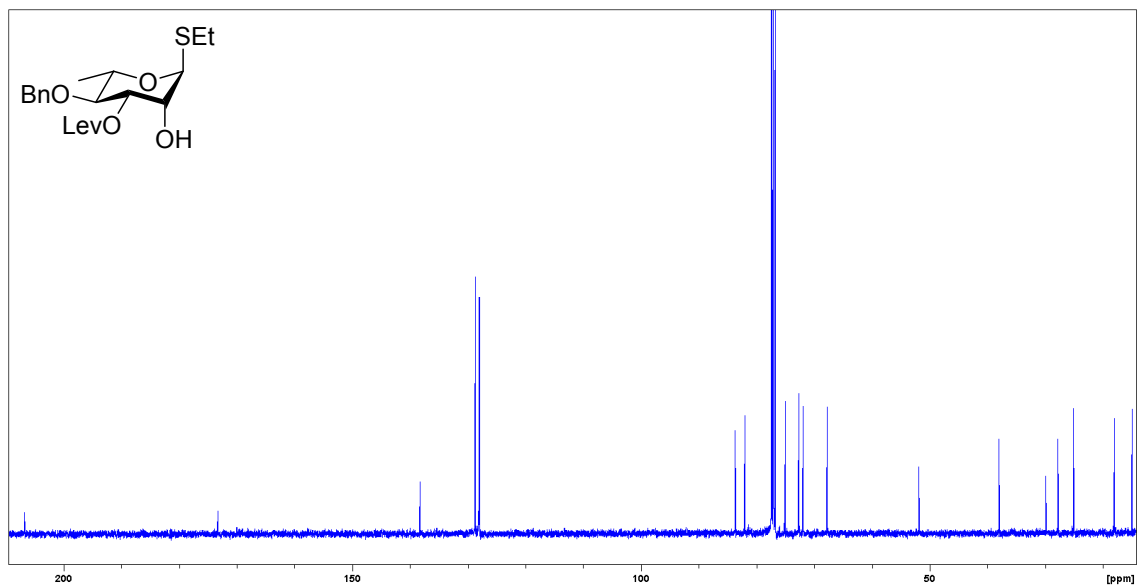

$^1\text{H}$  of compound 10

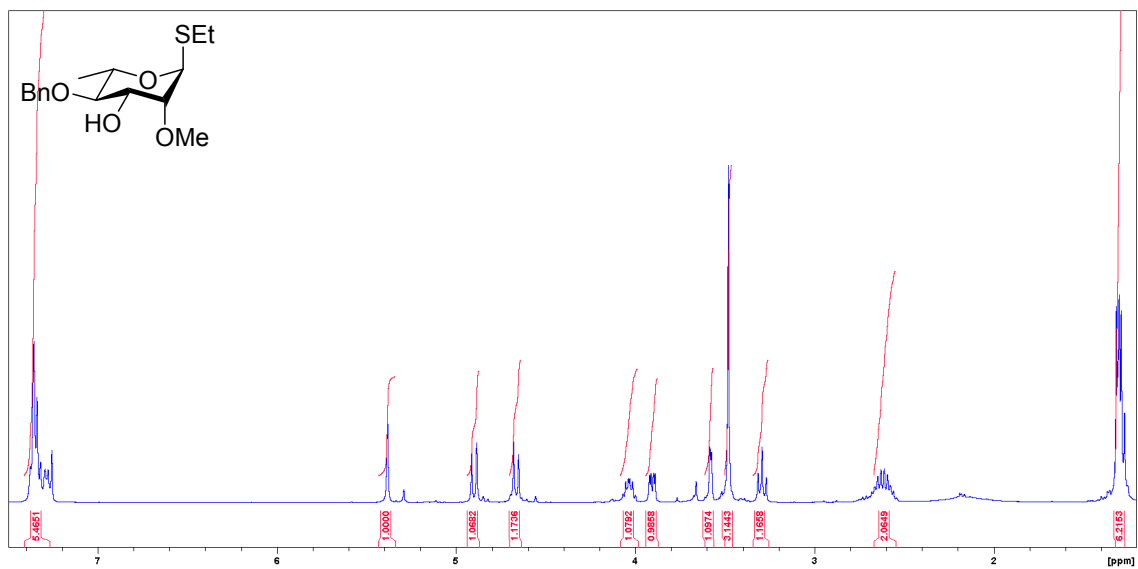

$^{13}\text{C}$  of compound 10

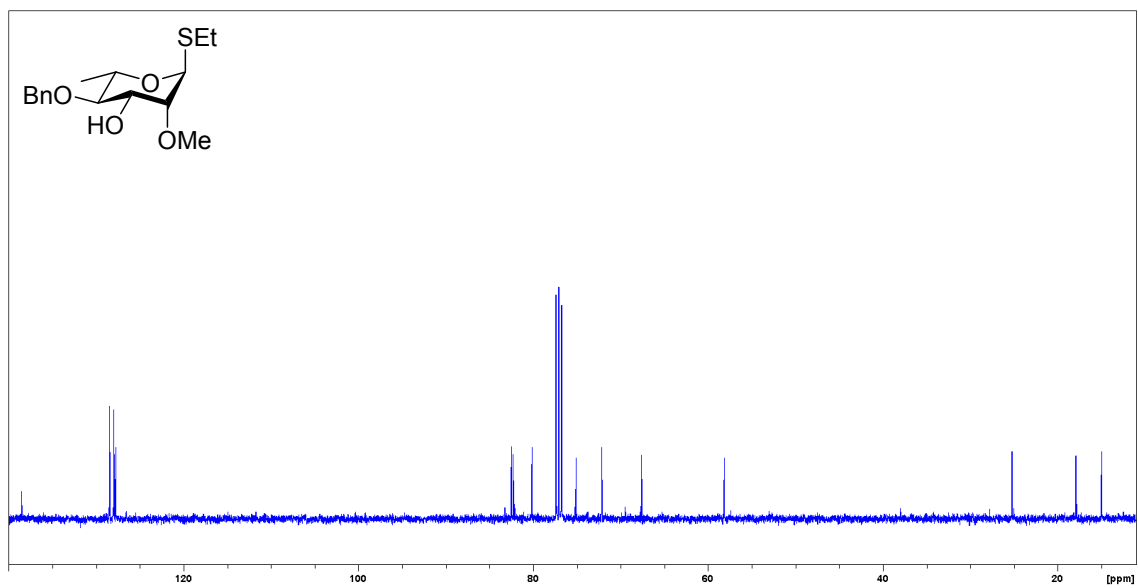

$^1\text{H}$  of compound 11

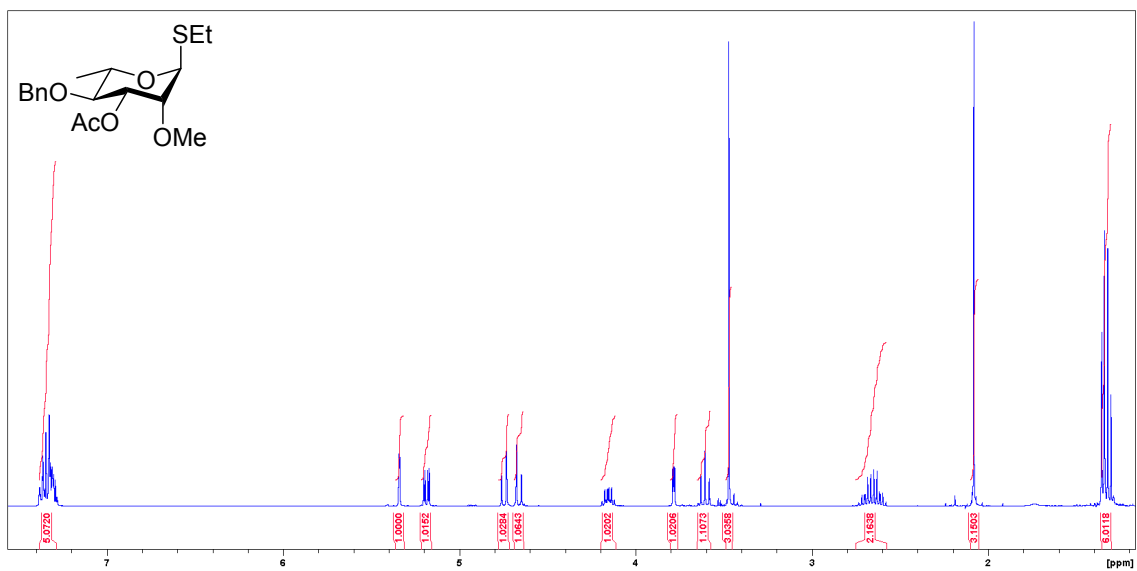

$^{13}\text{C}$  of compound 11

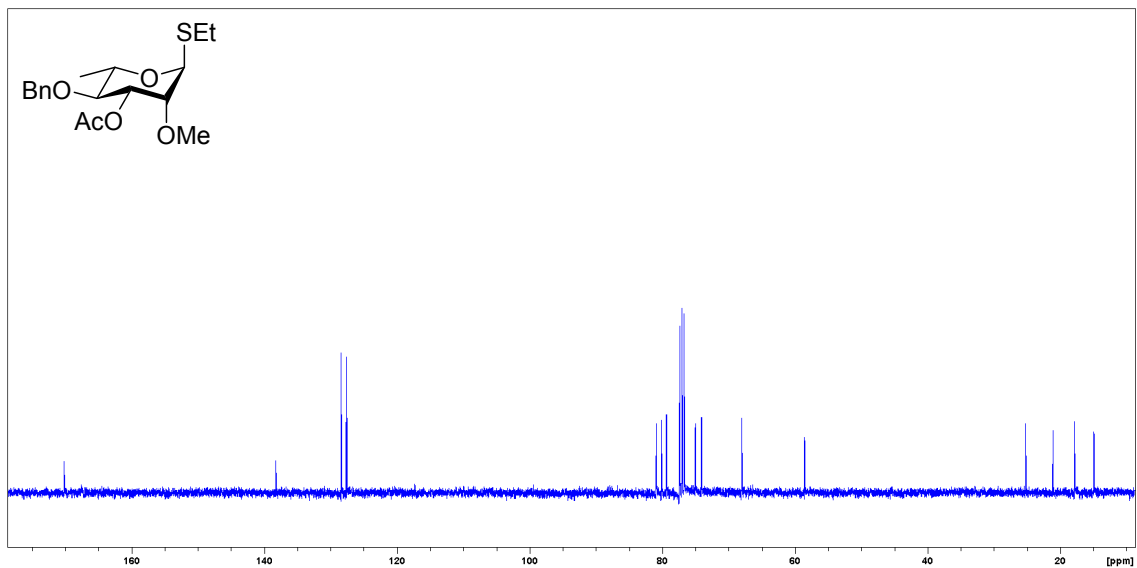

### $^1\text{H}$ of compound 12

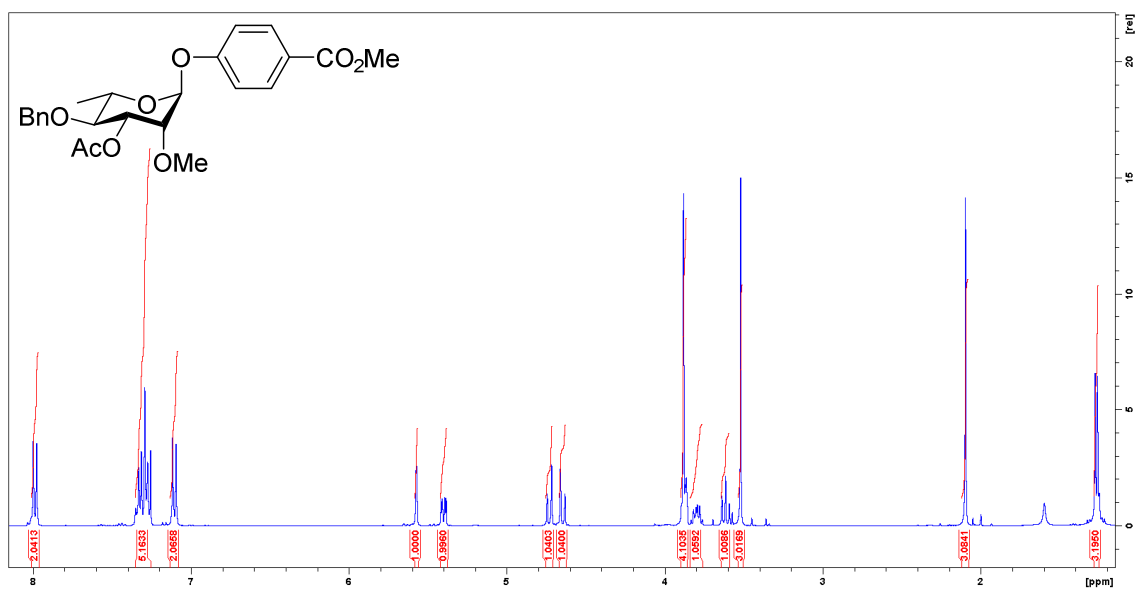

### $^{13}\text{C}$ of compound 12

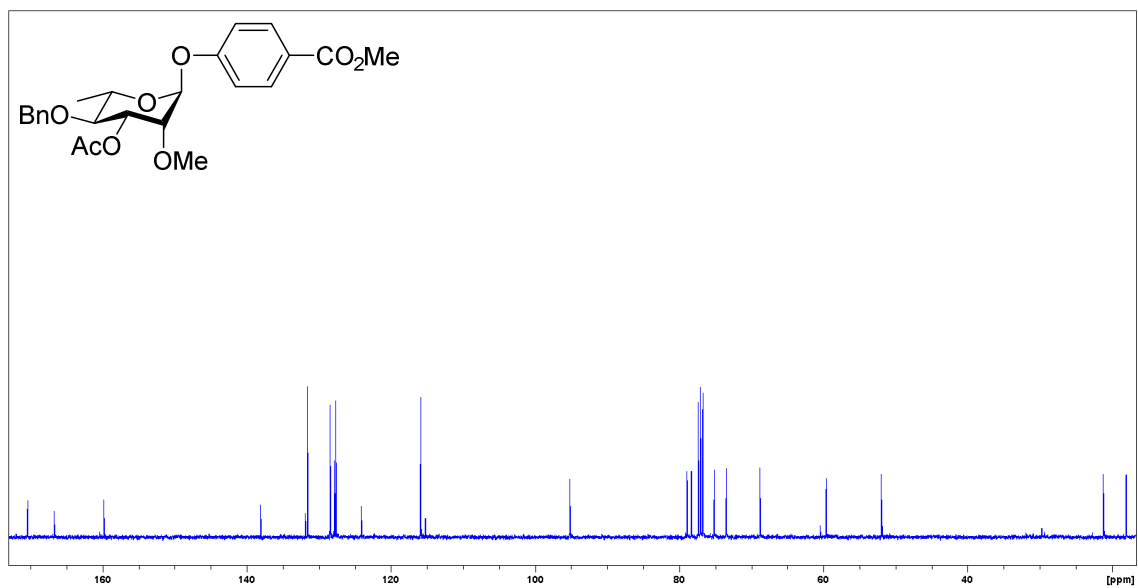

### <sup>1</sup>H of compound 13

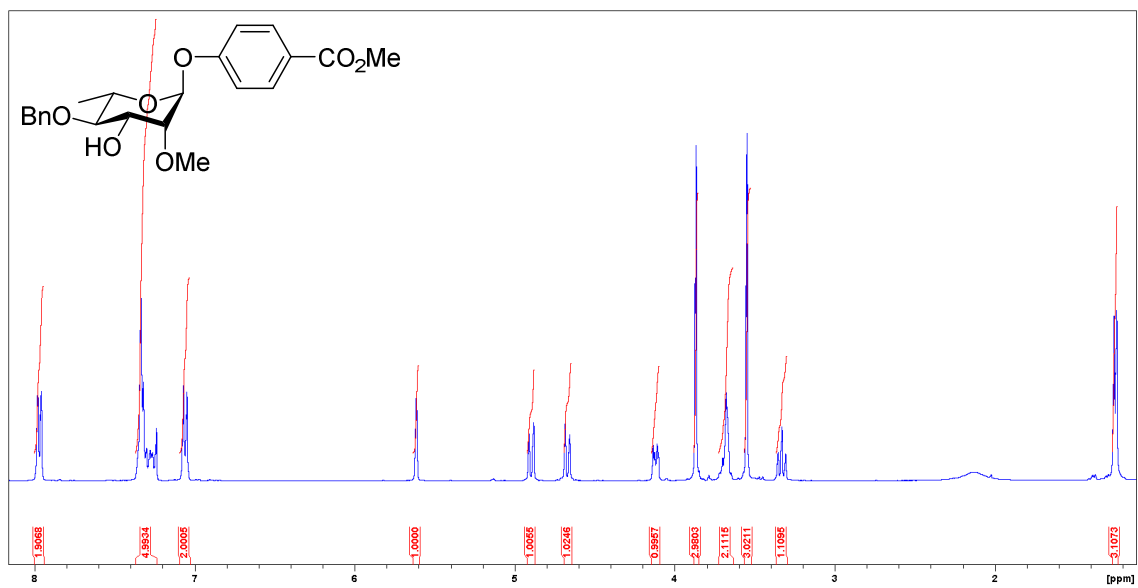

### <sup>13</sup>C of compound 13

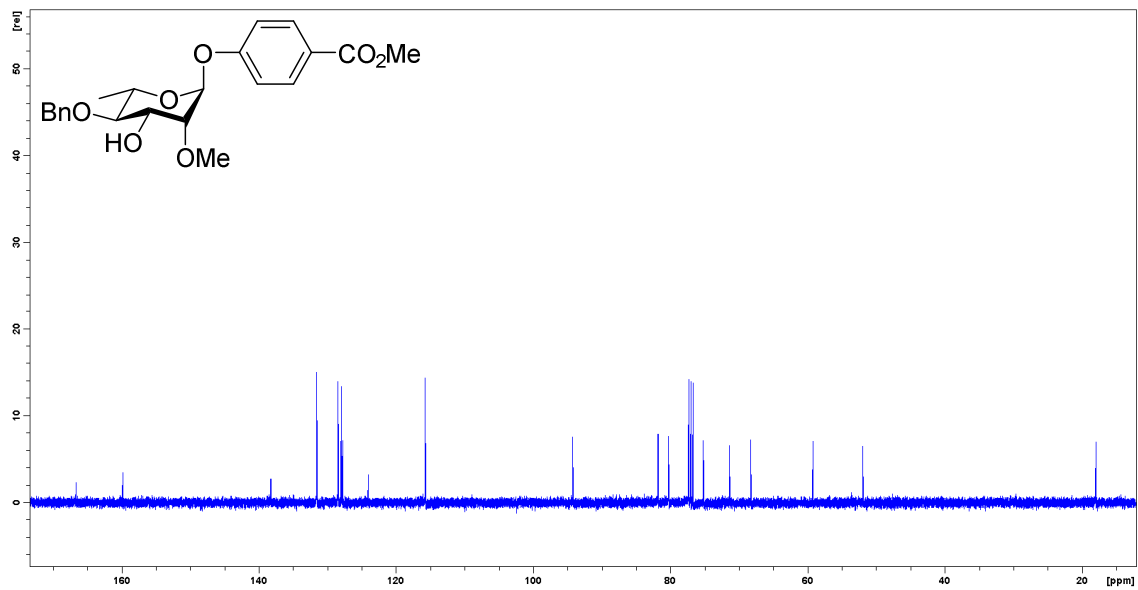

<sup>1</sup>H of compound 14

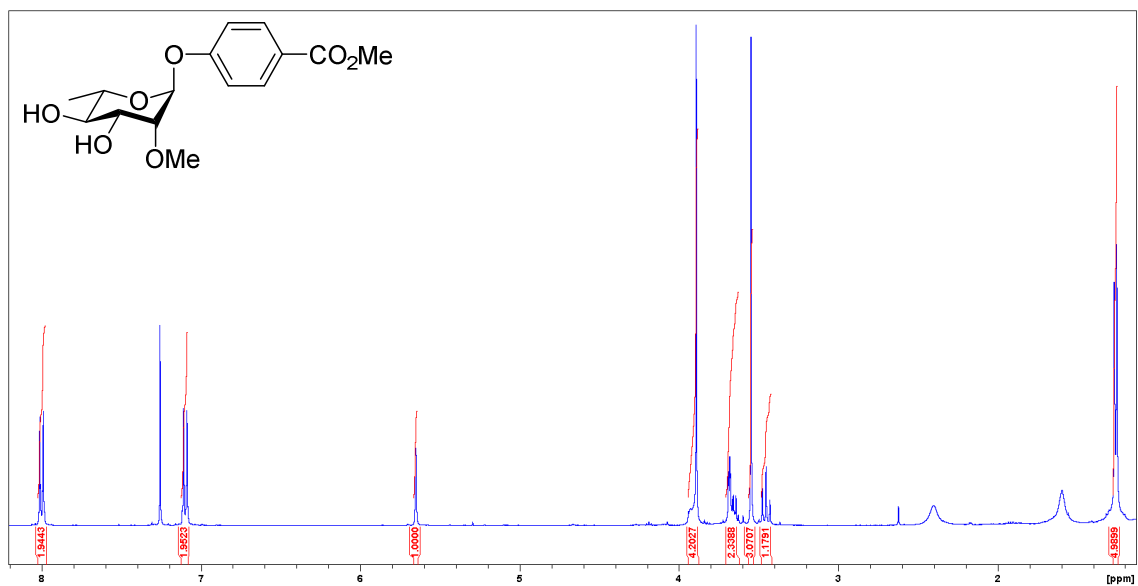

<sup>13</sup>C of compound 14

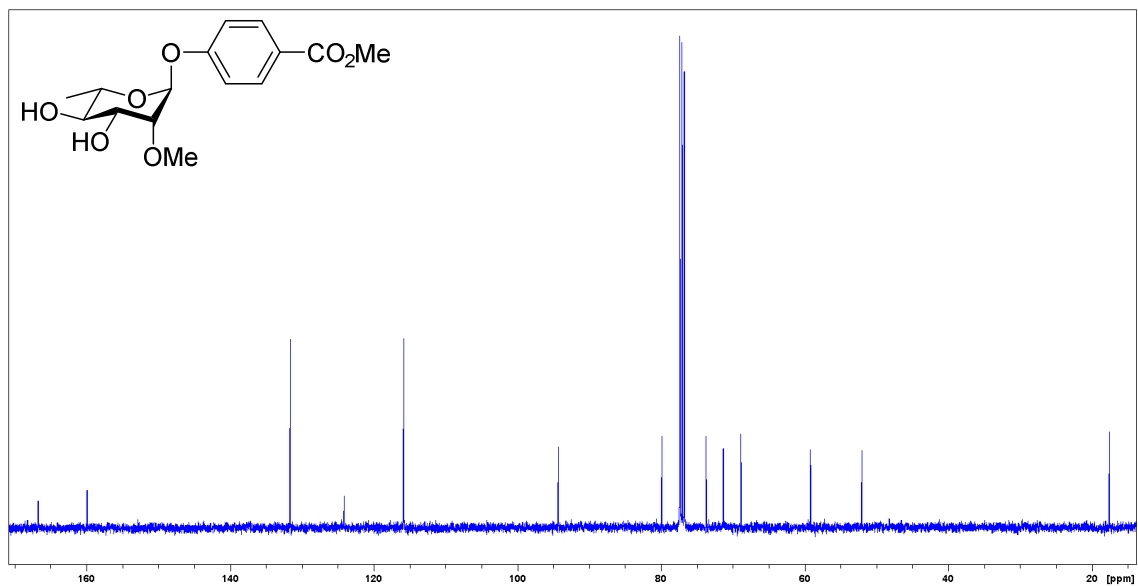



### $^1\text{H}$ of compound 15

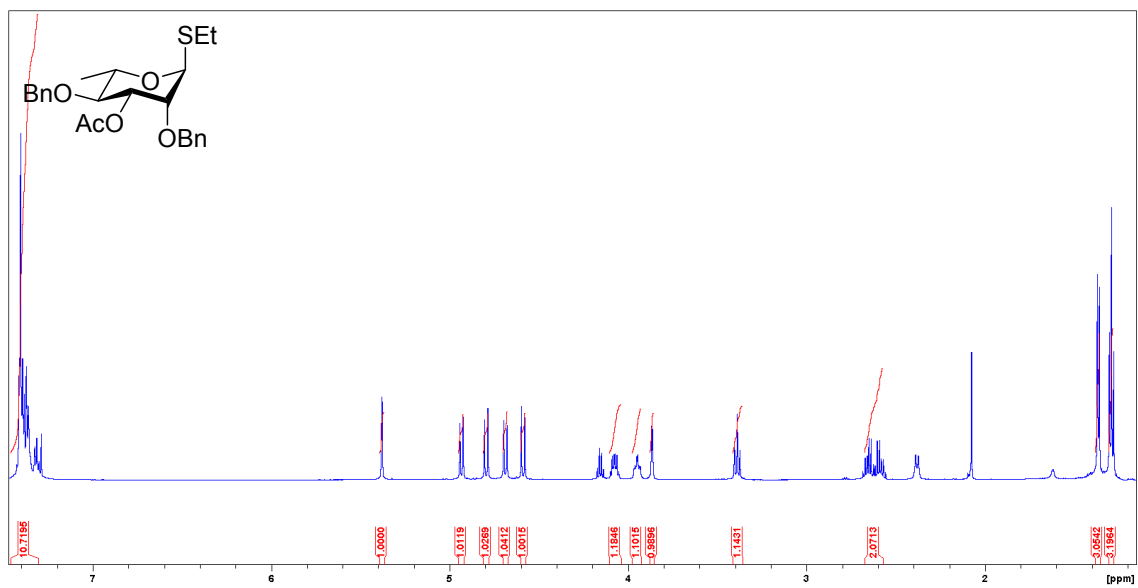

### $^{13}\text{C}$ of compound 15

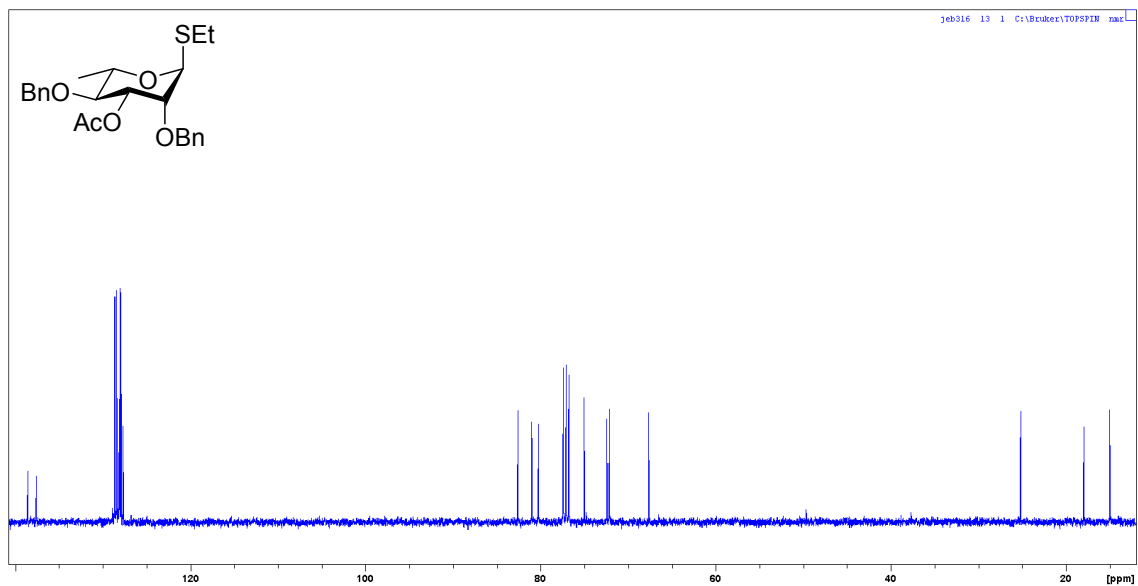

<sup>1</sup>H of compound 16

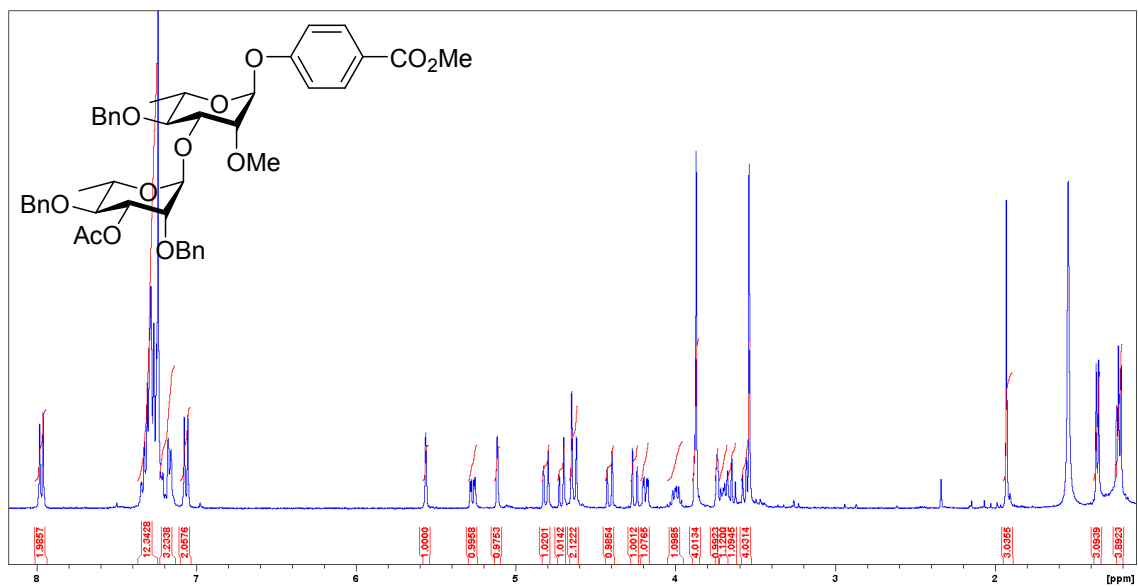

<sup>13</sup>C of compound 16

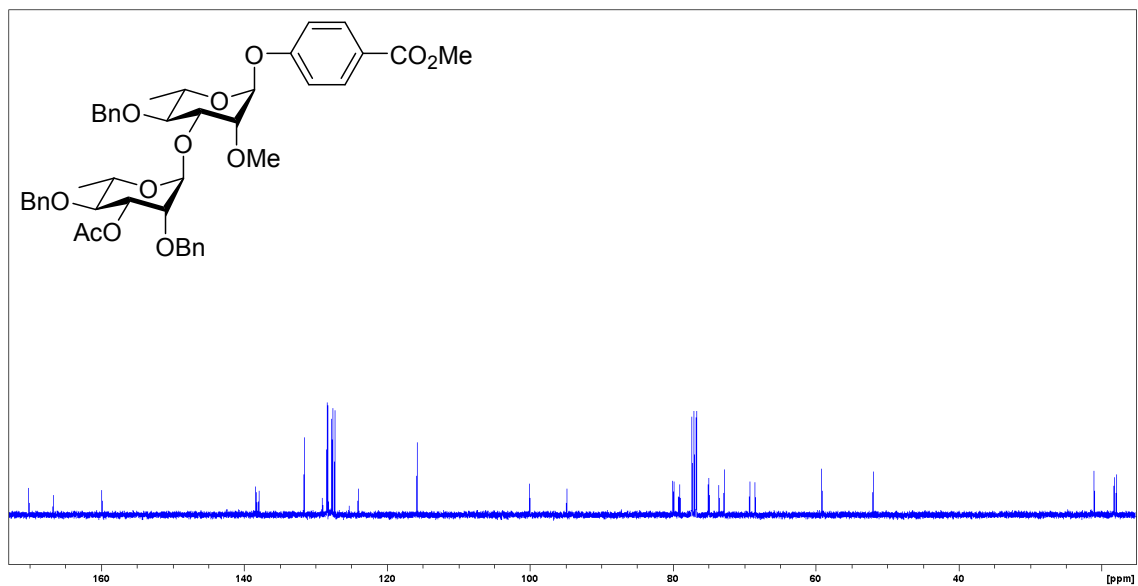

### $^1\text{H}$ of compound 17

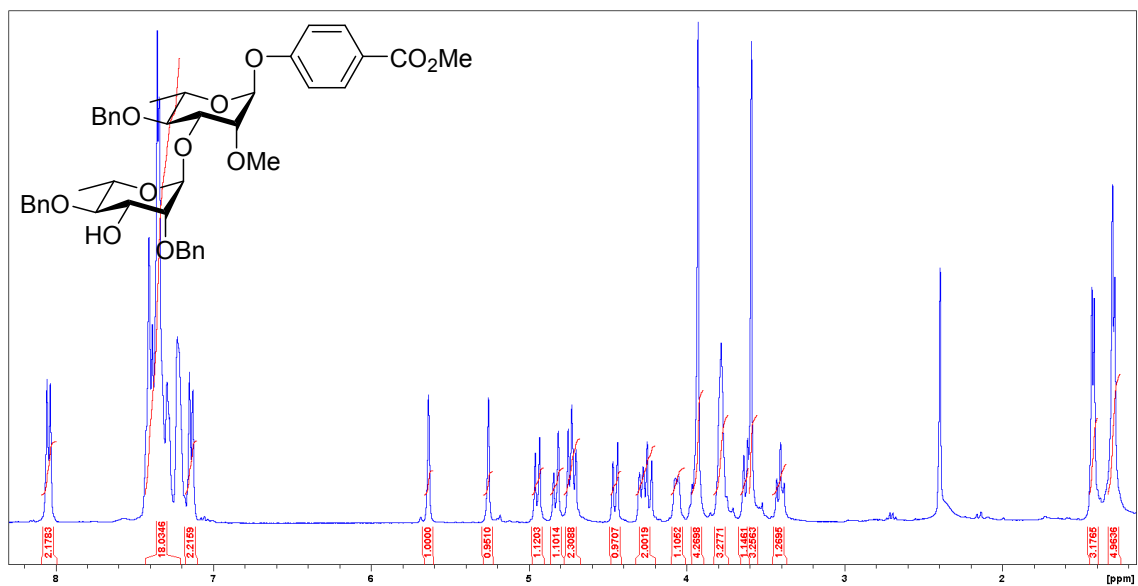

### $^{13}\text{C}$ of compound 17

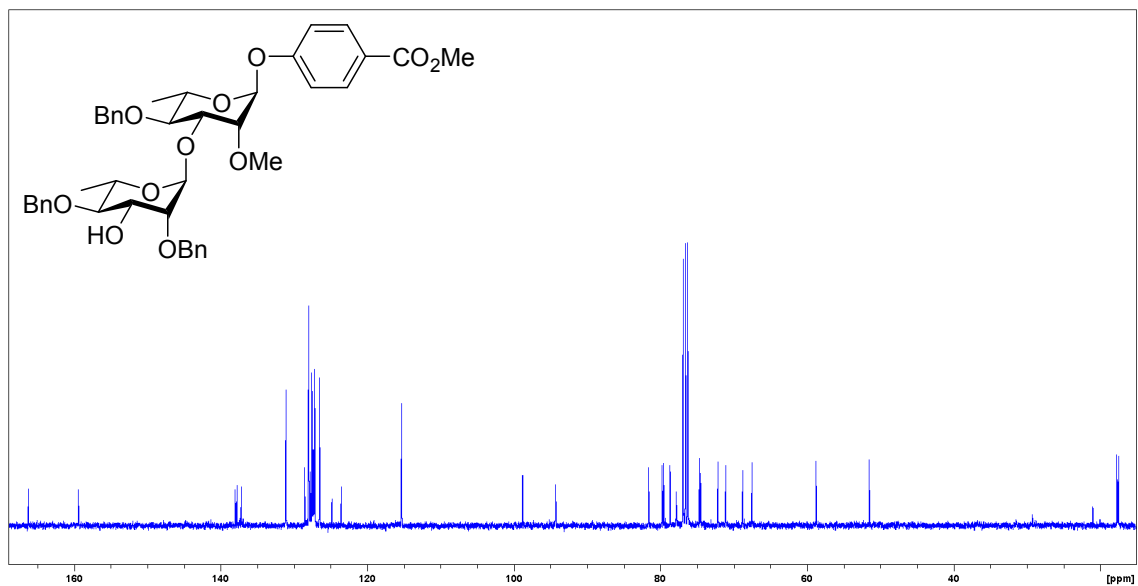

### <sup>1</sup>H of compound 18

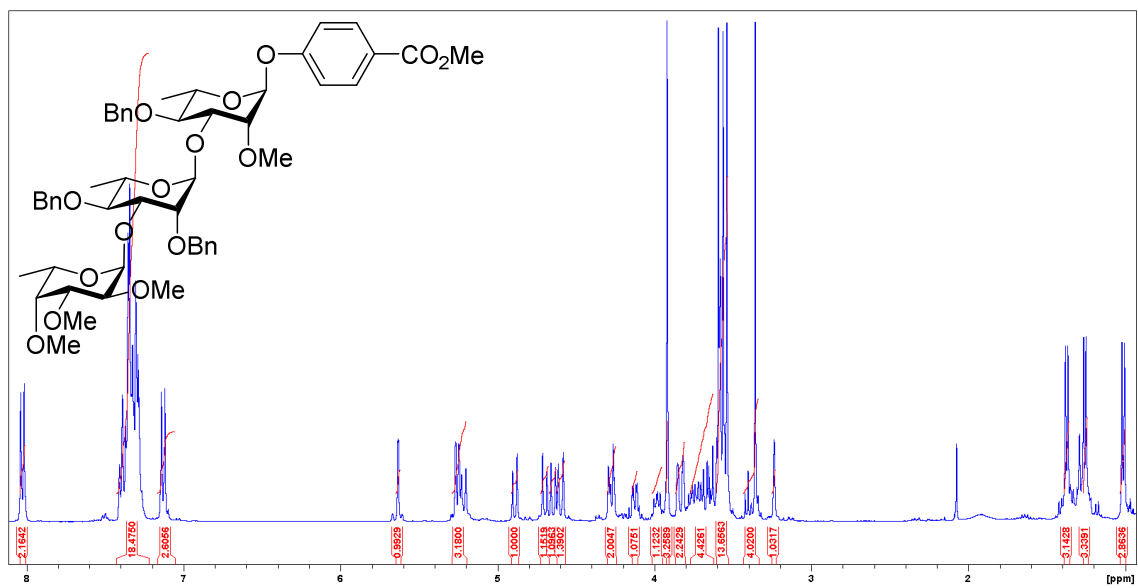

### <sup>13</sup>C of compound 18

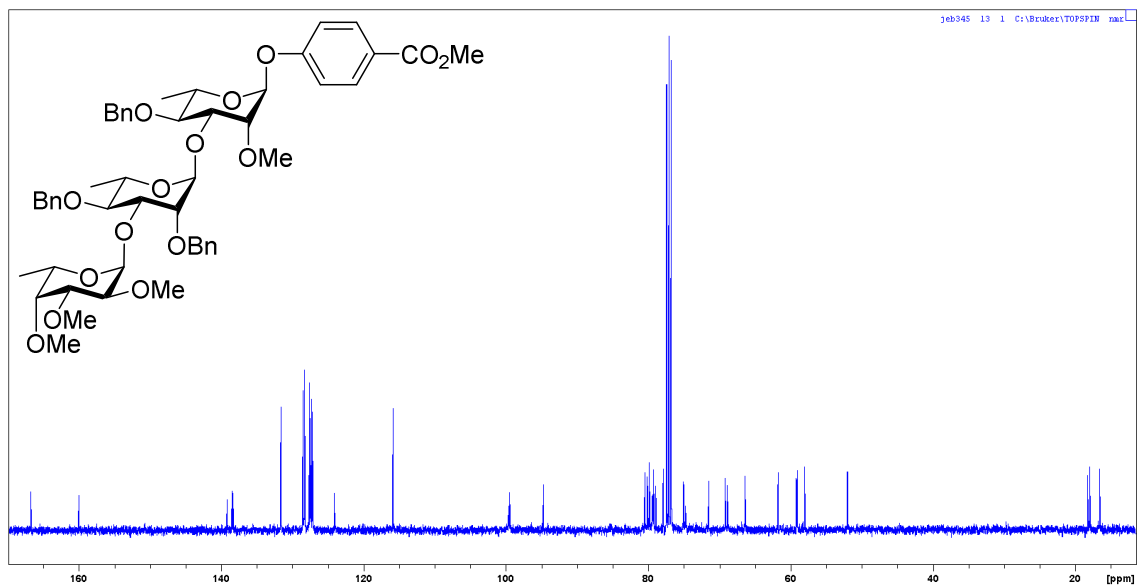

### <sup>1</sup>H of compound 19

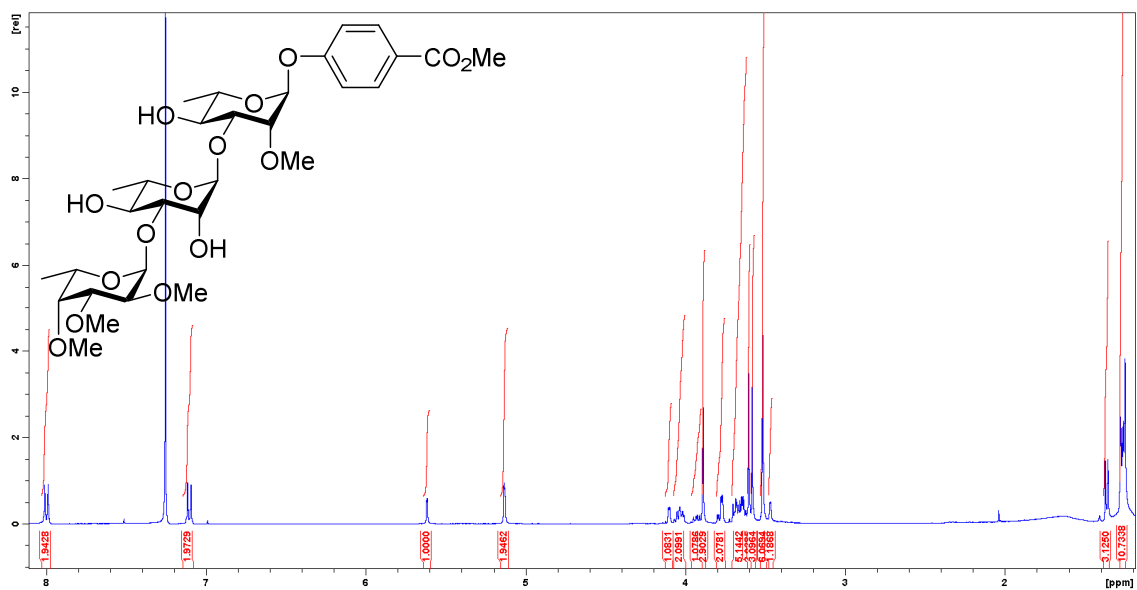

### <sup>13</sup>C of compound 19

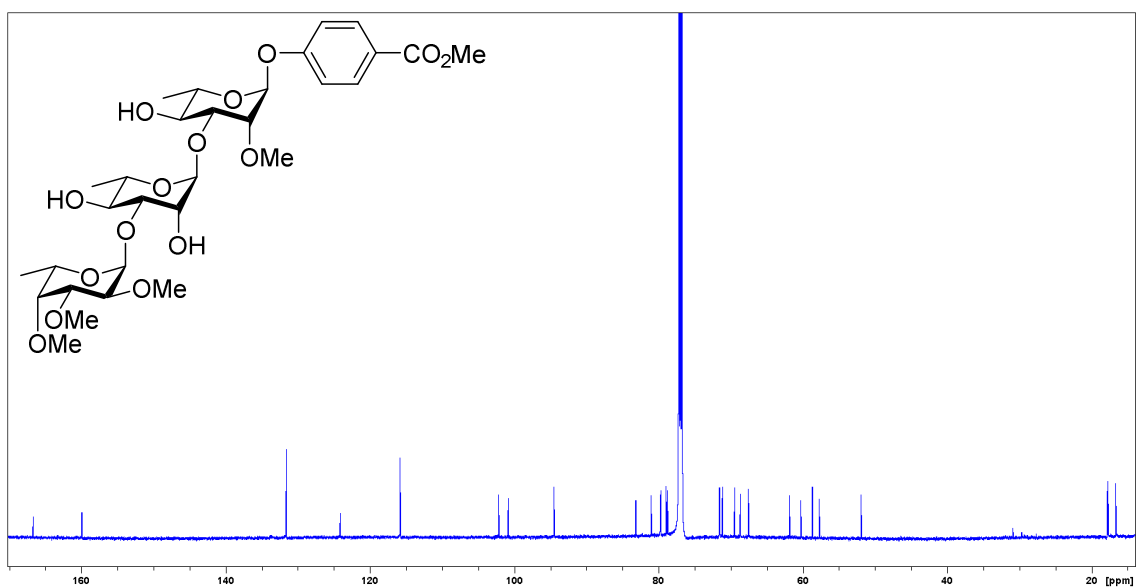

### <sup>1</sup>H of compound 20

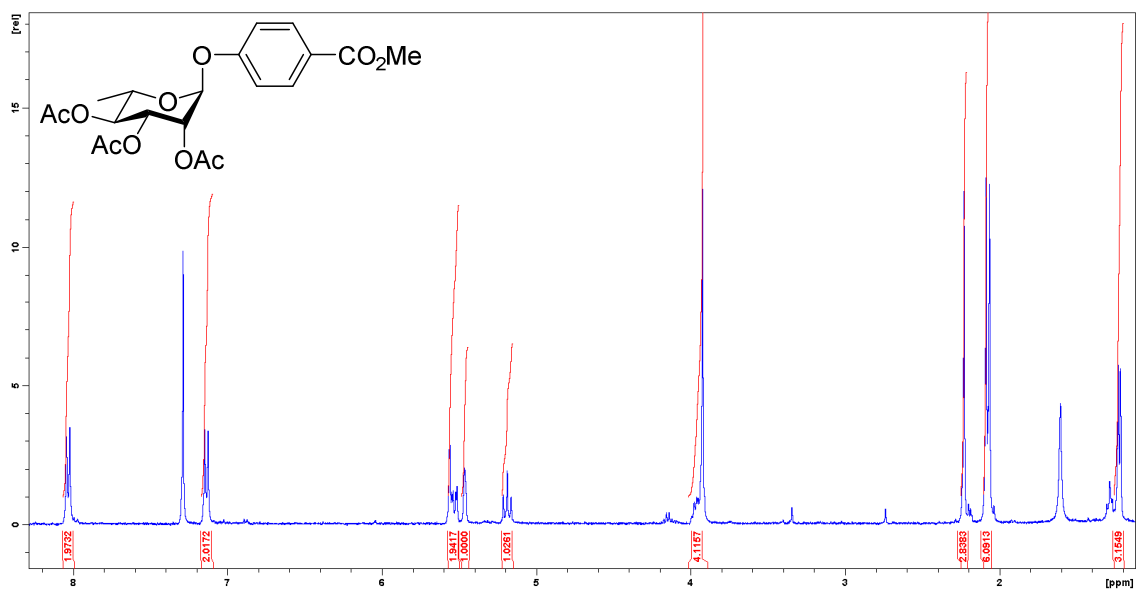

### <sup>13</sup>C of compound 20

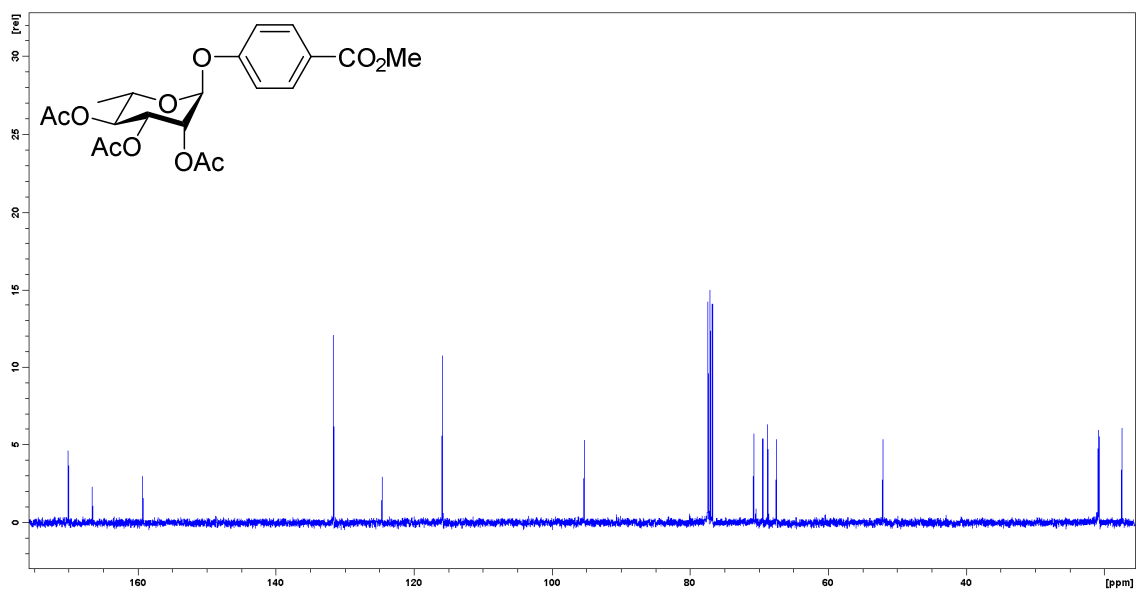

### <sup>1</sup>H of compound 21

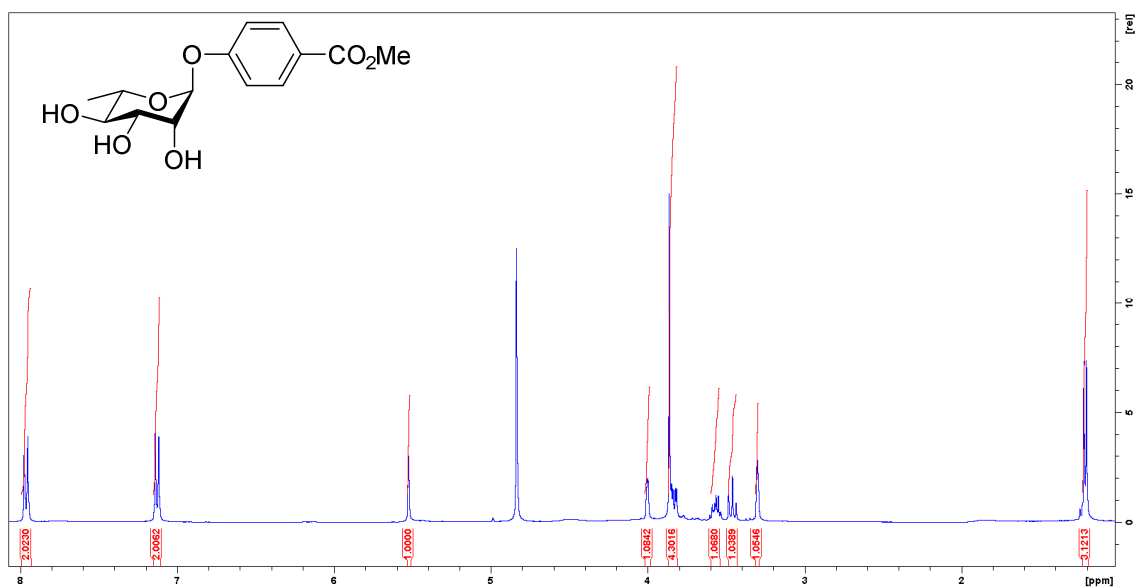

### <sup>13</sup>C of compound 21

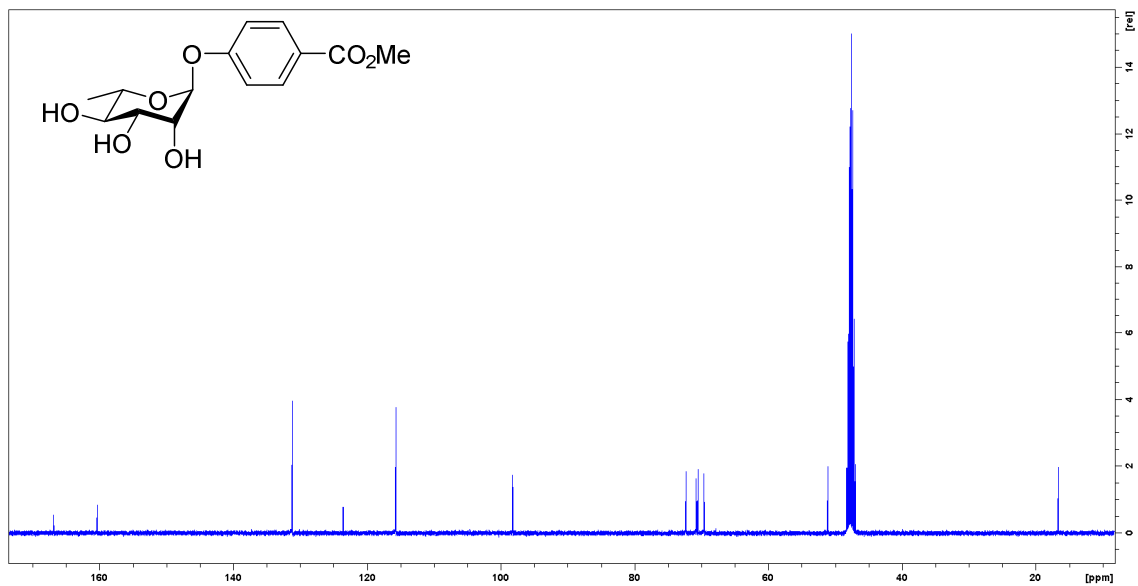

Supplement: c3ob42277a.pdf [file c3ob42277a.pdf]
